# Supplementary material
Source: PubMed Central journal article supplement (PMC4704208)
Supplement: AAC.01559-15_zac001164710so1.pdf [file AAC.01559-15_zac001164710so1.pdf]

Table S1. List of primers used to amplify the *ompC*-like and *ompF*-like genes

| Target genes  | Organisms            | Primers                                             | References |
|---------------|----------------------|-----------------------------------------------------|------------|
| <i>ompF</i>   | <i>E. cloacae</i>    | OmpF-F (5'-AGACACCAAACCTCTCATCAATAGTTC-3')          | 1          |
|               |                      | OmpF-R (5'-CGCTATCAGGTTAACGGTA-3')                  |            |
| <i>ompF</i>   | <i>E. cloacae</i>    | OmpF-INT-F (5'-AAACCCGTCTGGCATTTCG-3') <sup>b</sup> | This study |
|               |                      | OmpF-INT-R (5'-GGCTGCCAGACGCGC-3') <sup>b</sup>     |            |
| <i>ompC</i>   | <i>E. cloacae</i>    | OmpC-F (5'-GAGCTCGTTAATGATGATAGCGAGAGTTAT-3')       | 1          |
|               |                      | OmpC-R (5'-GCATGCACGTTCCCATGGTTTTGCCTTCCAGCA-3')    |            |
| <i>ompC</i>   | <i>E. cloacae</i>    | OmpC-INT-F (5'-AAACAACCTCCTGGACTCG-3') <sup>b</sup> | This study |
|               |                      | OmpC-INT-R (5'-GTTCTGCGCTTTGTTAGC-3') <sup>b</sup>  |            |
| <i>ompK35</i> | <i>K. pneumoniae</i> | OmpK35-F (5'-GCACGAAACAGATCGGCCAG                   | 1          |
|               |                      | OmpK35-R (5'-TTACGTCACCGGCGTGCAGAA-3')              |            |
| <i>ompK36</i> | <i>K. pneumoniae</i> | OmpK36-F (5'-GACCCGCCAGAAGGTGCCCA-3')               | 1          |
|               |                      | OmpK36-R (5'-TGATGTTGCCGGGGATCAGGGA-3')             |            |
| <i>omp35</i>  | <i>E. aerogenes</i>  | Omp35-F (5'-GCGCAATATTCTGGCAGTGG-3')                | 1          |
|               |                      | Omp35-R (5'-TAAACGATACCAACCGCAGCCT-3')              |            |
| <i>omp36</i>  | <i>E. aerogenes</i>  | OmpK36-F (5'-GACCCGCCAGAAGGTGCCCA-3')               | 1          |
|               |                      | OmpK36-R (5'-TGATGTTGCCGGGGATCAGGGA-3')             |            |
| <i>ompC</i>   | <i>E. coli</i>       | EcOmpCA (5'-GTAAAGTAC TGTCCCTCCTG-3')               | 2          |
|               |                      | EcOmpCB (5'-GAACTGGTAAA CCAGACCCAG-3')              |            |

|                  |                      |                                                            |            |
|------------------|----------------------|------------------------------------------------------------|------------|
| <i>ompF</i>      | <i>E. coli</i>       | EcOmpFA (5'-CAGGTACTGCAAACGCTGC-3')                        | 2          |
|                  |                      | EcOmpFB (5'-GTCAACATAGGTGGACATG-3')                        |            |
| <i>ompC-like</i> | <i>S. marcescens</i> | OmpC-SMAR-F (5'-ATAATAACGATGAAATTCG-3')                    | This study |
|                  |                      | OmpC-SMAR-R (5'-ACGTTCACTGAGGTGCTT-3')                     |            |
| <i>ompF-like</i> | <i>S. marcescens</i> | OmpF-SMAR-F (5'-GAGGGTAATAATGATGAAGC-3')                   | This study |
|                  |                      | OmpF-SMAR-R (5'-GCGAGACAACTTAGAACTGG-3')                   |            |
| <i>ompF-like</i> | <i>S. marcescens</i> | OmpF-INT-SMAR-F (5'-TCGCCGGTCTGAAATTCG-3') <sup>b</sup>    | This study |
|                  |                      | OmpF-INT-SMAR-R (5'-TCTGAGTTTTGCTAGCGAAGC-3') <sup>b</sup> |            |
| <i>ompC-like</i> | <i>C. freundii</i>   | OmpC-CFRE-F (5'-ATAAAGGCATATAACAGAGG-3')                   | This study |
|                  |                      | OmpC-CFRE-R (5'-ATGAACGCAGATTAGAACTGG-3')                  |            |
| <i>ompF-like</i> | <i>C. freundii</i>   | OmpF-CFRE-F (5'-GATGAAGCGCAATATTCTGG-3')                   | This study |
|                  |                      | OmpF-CFRE-R (5'-AGGTCTGCTATTAGAACTGG-3')                   |            |
| <i>ompC-like</i> | <i>C. freundii</i>   | OmpC-CFRE-INT-F (5'-AGTGGGAATACCAGATTCAGG-3') <sup>b</sup> | This study |
|                  |                      | OmpC-CFRE-INT-R (5'-CAGACCGAAGTCGAACTGG-3') <sup>b</sup>   |            |

---

<sup>b</sup> Primers used to amplify an internal fragment of the gene.

## References

1. **Doumith M, Ellington MJ, Livermore DM, Woodford N.** 2009 Molecular mechanisms disrupting porin expression in ertapenem-resistant *Klebsiella* and *Enterobacter* spp. clinical isolates from the UK. *J Antimicrob Chemother.* **63**:659-667.

2. **Poirel L, Héritier C, Spicq C, Nordmann P.** 2004. *In vivo* acquisition of high-level resistance to imipenem in *Escherichia coli*. J Clin Microbiol **42**:3831–3833.
